# Supplementary material
Source: PubMed Central journal article supplement (PMC3387069)
Supplement: 1204700109_pnas.1204700109_SI.pdf [file 1204700109_pnas.1204700109_SI.pdf]

# Supporting Information

Schmidt et al. 10.1073/pnas.1204700109

## SI Text

**Supplemental Methods.** CHO cells stably expressing Kv2.1 were used for electrophysiology. Currents were recorded in the whole-cell mode and in outside-out patch mode. For both, bath solution contained (mM): 135 NaCl, 15 KCl, 3 MgCl<sub>2</sub>, 1 CaCl<sub>2</sub>, 5 Glucose, 10 HEPES-NaOH (pH 7.3, 310 mOsm/kg); and the pipette solution contained (mM): 150 KCl, 3 MgCl<sub>2</sub>, 5 EGTA, 10 HEPES-KOH (pH 7.3, 310 mOsm/kg). Electrodes were drawn

from borosilicate patch glass (VWR) and polished (MF-83, Narishige Co.) to a resistance of 2–4 M $\Omega$ . Analog signals were filtered (1 kHz) using the built-in 4-pole Bessel filter of an Axopatch 200B patch clamp amplifier (Molecular Devices) in patch-mode, digitized at 10 kHz (Digidata 1440A, Molecular Devices) and stored on a computer hard disk.

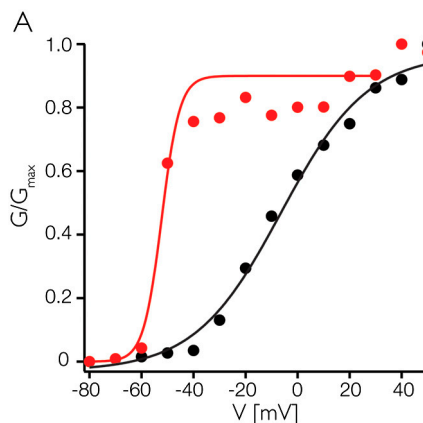

**Fig. S1.** The effect of membrane configuration. Kv2.1 in outside-out patch (red) or whole-cell configuration (black) recorded from the same CHO cell. Boltzmann functions (solid lines) fit data with  $V_m$  (mV) and  $z$  ( $q_e$ ):  $-52.3 \pm 1.42$ ,  $7.52 \pm 2.7$  (outside-out patch), and  $-6.32 \pm 2$ ,  $1.5 \pm 0.1$  (whole cell).

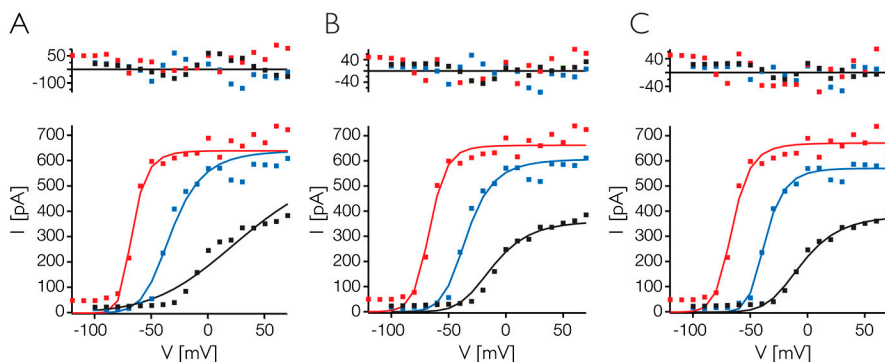

**Fig. S2.** Mechanosensitivity can be explained by varying  $L$ , but not  $K(V)$ . Kv2.1 channels in the same on-cell patch with 0 mmHg (black), 5 mmHg (blue) and 15 mmHg (red) of transient pressure applied. Solid lines are fits to Eq. 1 (see main text) using the relationship  $\langle I \rangle = iNP_O$ , with the following constraints in place: (a)  $V_m$  and  $z$  independently fit for each pressure value,  $L$  constrained to be the same for all pressure values. (b)  $V_m$  and  $z$  constrained to be the same for all pressure values,  $L$  independently fit for each pressure value. (c)  $V_m$ ,  $z$  and  $L$  independently fit for each pressure value. Fitting residuals are plotted above each panel.  $\chi^2$  are 95494, 57871, and 45325 for (a–c) respectively.
